# Supplementary material
Source: HighWire-hosted journal article supplement (http://www.qdcxjkg.com/highwire/filestream/113050/field_highwire_adjunct_files/0/ERJ_20_245.pdf)
Supplement: ERJ_20_245.pdf [file ERJ_20_245.pdf]

## Erratum

**"Formoterol in patients with chronic obstructive pulmonary disease: a randomized, controlled, 3-month trial". R. Aalbers, J. Ayres, V. Backer, M. Decramer, P.A. Lier, P. Magyar, J. Malolepszy, R. Ruffin, G.W. Sybrecht. *Eur Respir J* 2002; 19: 936–943.**

Unfortunately, there was an error in the legend for figure 2. The corrected legend is reproduced below with the figure.

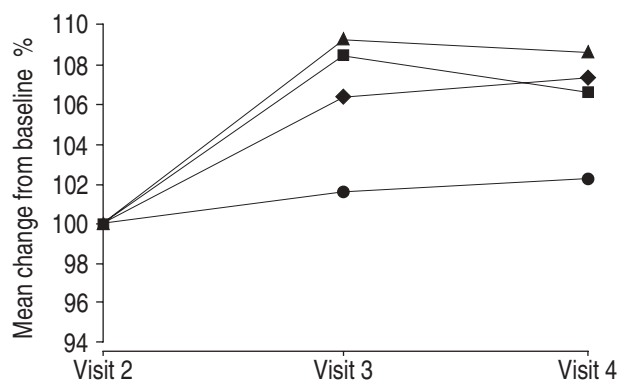

Fig. 2.—Forced expiratory volume in one second change from baseline at clinic visits compared with placebo after treatment with formoterol. ▲: 18 µg; ■: 9 µg; ◆: 4.5 µg; ●: placebo.
